# Supplementary material for: RNA Sequencing Revealed Signals of Evolution From Gallbladder Stone to Gallbladder Carcinoma
Source: PubMed Central journal article supplement (PMC7272658; doi:10.3389/fonc.2020.00823), 2020-05-29
Supplement: Image_1.pdf [file Image_1.pdf]

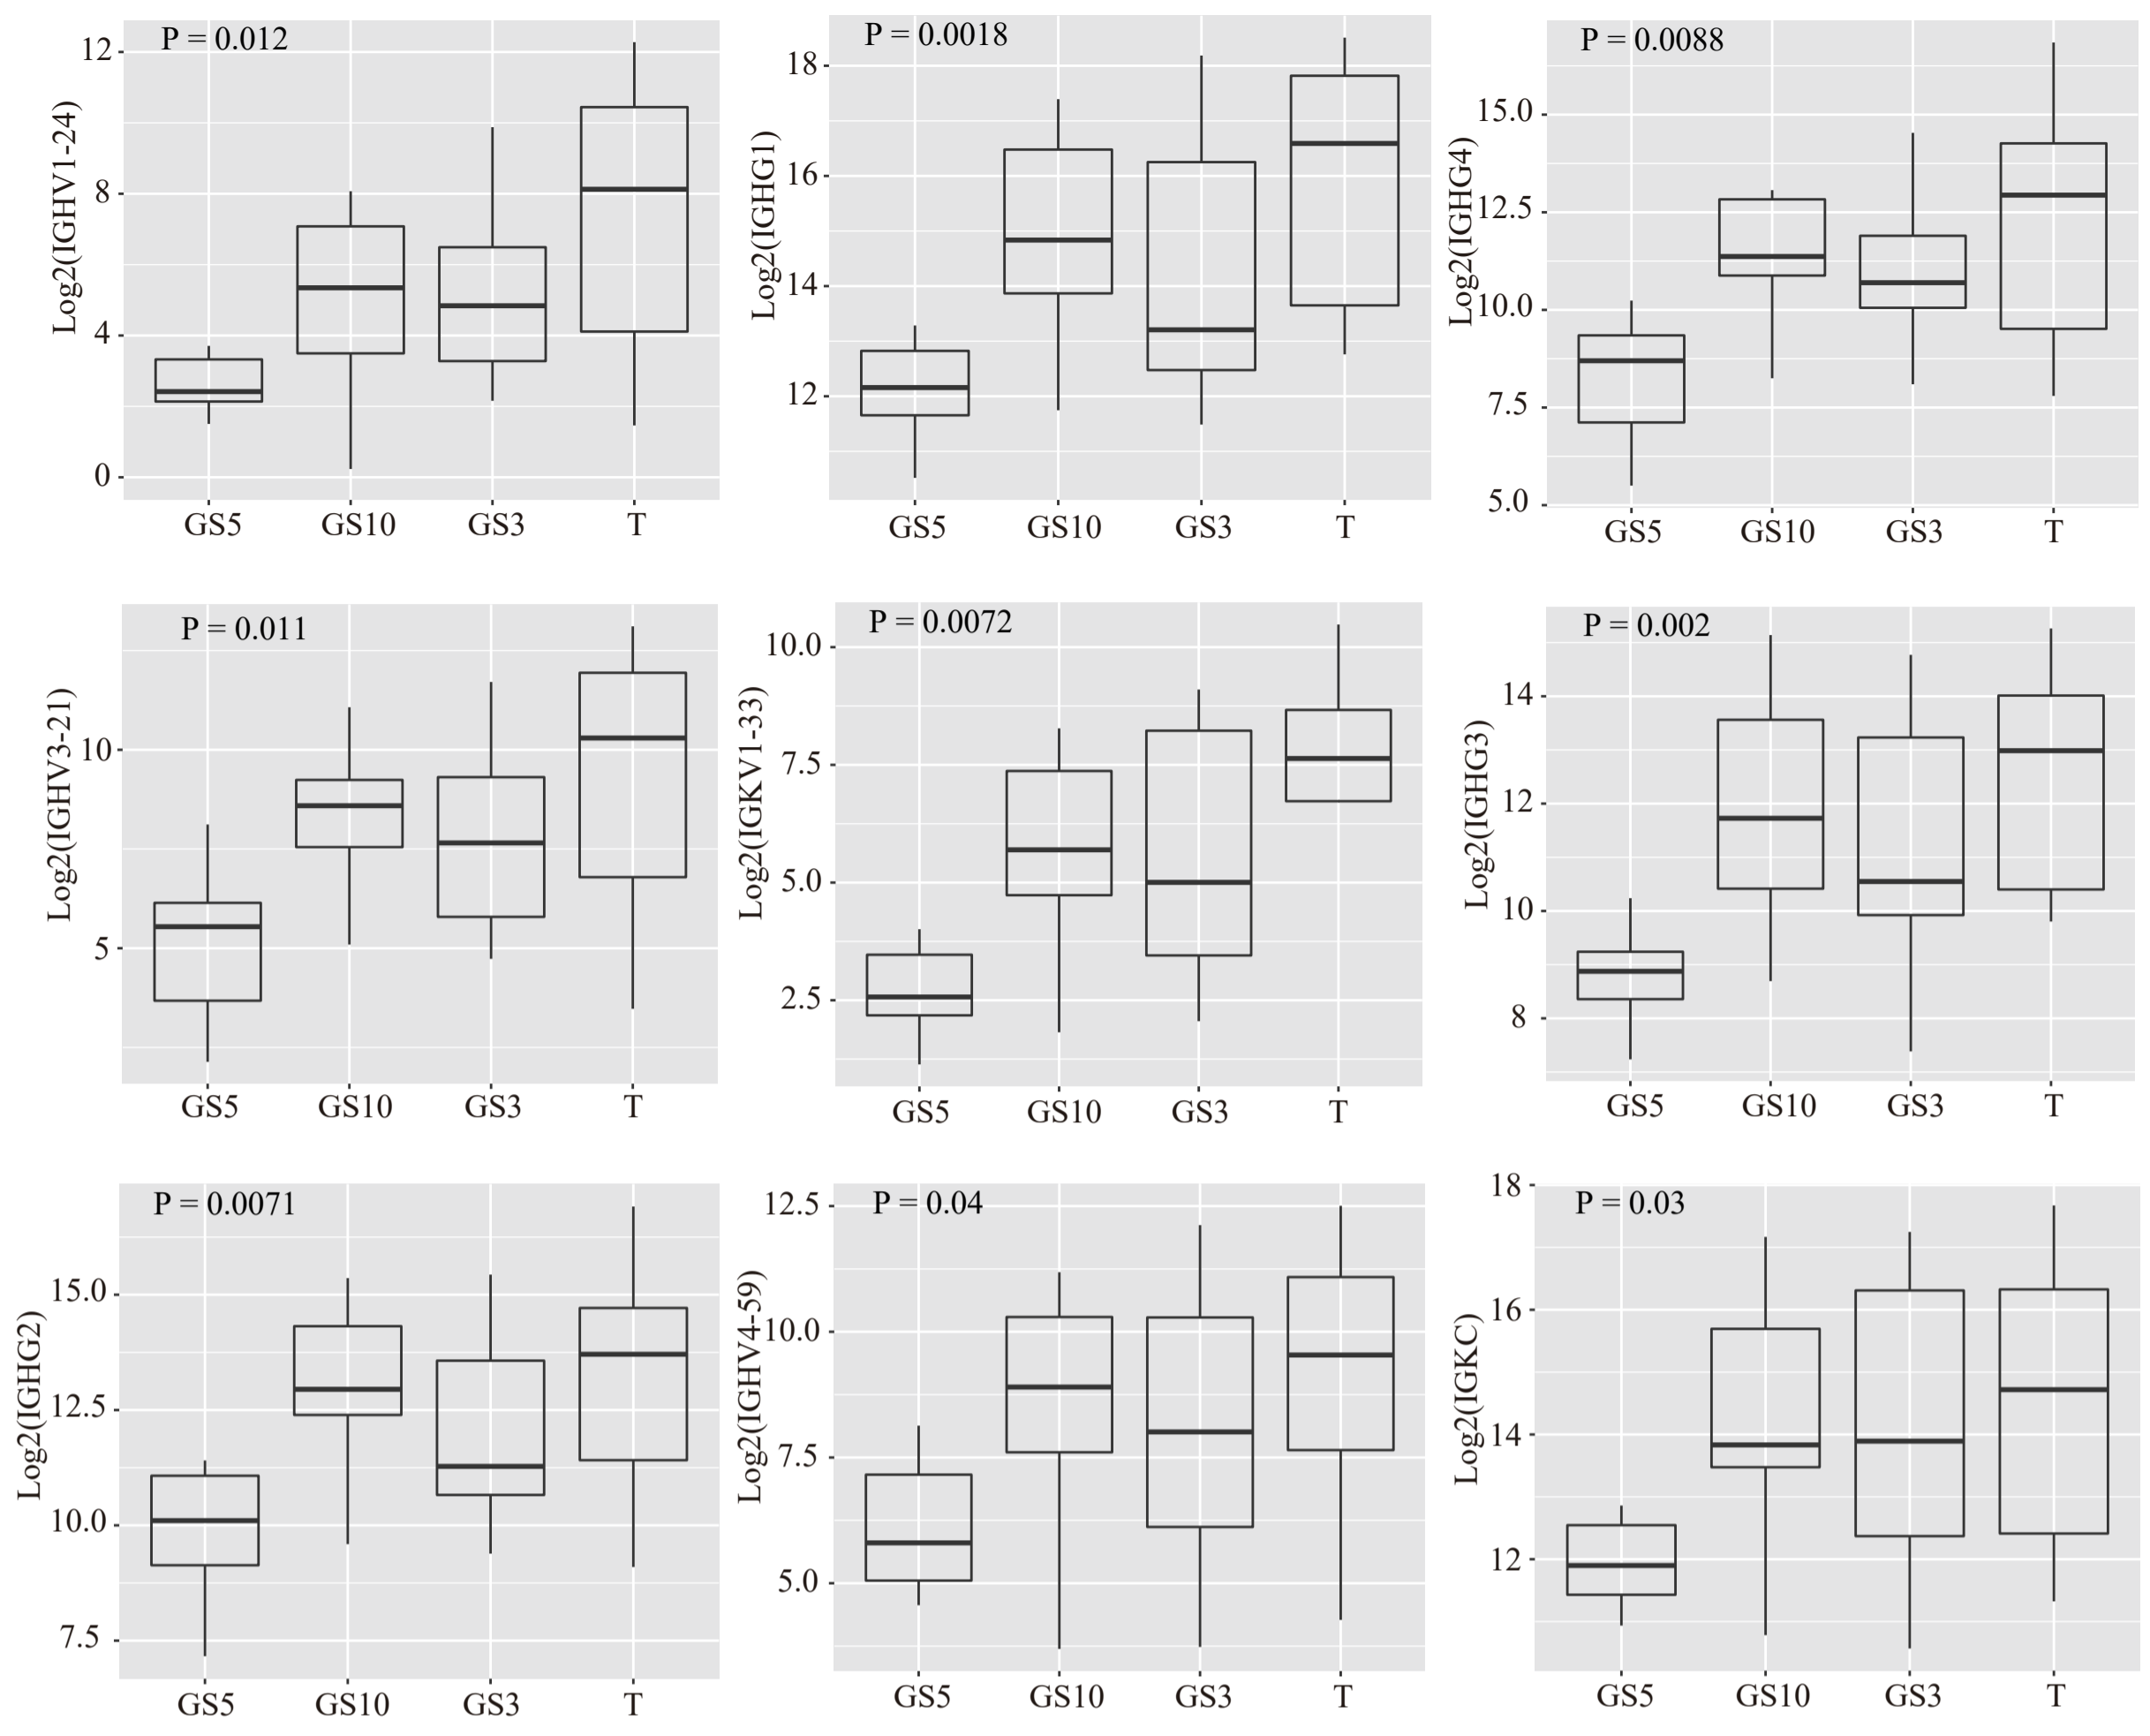

**Figure S1** Expression level of 9 genes in four groups which were associated with immunoglobulin complex.
